# Supplementary material
Source: publisher figshare collection journal article supplement (https://gsapubs.figshare.com/ndownloader/files/23298158)
Supplement: Supplementary file 1 [file 23298158]

## Sheet: Table A3
TABLE 5. Trace element data with associated 2se errors													TABLE 5. Trace element data with associated 2se errors continued															TABLE 5. Trace element data with associated 2se errors continued
Spot location	La_ppm	2se	Ce_ppm	2se	Pr_ppm	2se	Nd_ppm	2se	Sm_ppm	2se	Eu_ppm	2se	Spot location	Gd_ppm	2se	Tb_ppm	2se	Dy_ppm	2se	Ho_ppm	2se	Er_ppm	2se	Tm_ppm	2se	Yb_ppm	2se	Spot location	Lu_ppm	2se	206Pb_ppm	2se	207Pb_ppm	2se	208Pb_ppm	2se	Total HREE	Gd/Yb
046_Mz1_1	62100	6400	143000	15000	15600	1800	62000	15000	11000	3900	578	54	046_Mz1_1	8620	620	1049	71	5190	330	530	32	724	44	56.2	5.3	87.3	6.5	046_Mz1_1	2.79	0.39	103	14	105	13	99	9.4	16259.3	98.74
046_Mz1_2	58200	9000	135000	14000	15000	2100	50000	16000	11800	3800	580	88	046_Mz1_2	9490	750	1041	63	5340	330	509	38	728	44	47.8	4.4	87.2	7.6	046_Mz1_2	2.38	0.35	123	17	96	17	96	12	17245.4	108.83
046_Mz5_1	63000	11000	133000	11000	14800	1400	55000	15000	11000	3400	747	66	046_Mz5_1	6860	430	358	36	671	91	33.4	8.9	21.1	7.4	1.9	1	2.8	1.6	046_Mz5_1	0.13	0.064	103	17	91	12	104	10	7948.33	2450
046_Mz5_2	66100	8100	120000	13000	17300	1600	37600	9300	9980	3200	671	67	046_Mz5_2	5970	400	332	29	770	160	50	20	64	32	6.4	2.7	6.7	3.7	046_Mz5_2	0.27	0.14	121	13	123	15	119	12	7199.37	891.045
046_Mz5_3	57500	8400	134000	14000	16100	1300	53000	13000	11000	3700	679	95	046_Mz5_3	6120	310	419	53	1200	140	87	17	111	21	9.5	2.6	15.8	4	046_Mz5_3	0.341	0.099	140	23	145	15	111	15	7962.64	387.342
046_Mz5_4	55200	9200	130000	8600	16600	1500	64000	19000	9100	3400	604	75	046_Mz5_4	7550	780	780	110	3380	500	349	52	451	84	36.9	6.9	67	13	046_Mz5_4	2.14	0.41	94	14	83	8.4	93	12	12616	112.687
046_Mz5_5	64000	10000	127000	10000	15400	1700	63000	19000	9500	3600	515	71	046_Mz5_5	5740	440	495	66	2000	200	193	20	271	27	19.3	2.7	36.2	4.5	046_Mz5_5	1.2	0.27	116	20	109	14	119.6	8.9	8755.7	158.564
046_Mz6_2	53100	7900	130000	10000	15900	1300	73000	23000	9600	4300	696	76	046_Mz6_2	6560	530	516	62	1500	280	116	24	155	38	9.2	2.2	19.3	7.1	046_Mz6_2	0.69	0.23	103	10	92	12	100	14	8876.19	339.896
046_Mz6_3	57000	10000	142000	11000	14700	1500	48000	14000	9400	3800	636	64	046_Mz6_3	6470	620	333	33	520	32	19	2.8	11.3	3.9	0.39	0.61	0.13	0.26	046_Mz6_3	0.05	0.04	104	13	90	12	129.2	7.9	7353.87	49769.2
046_Mz8_1	59300	8900	140300	9800	15900	1500	71000	19000	7100	3300	556	82	046_Mz8_1	7810	490	719	53	3240	190	316	22	360	27	28.2	4.3	46.2	3.9	046_Mz8_1	1.32	0.2	101	17	86	12	98	12	12520.7	169.048
046_Mz9_1	58000	11000	138000	11000	17900	1800	56000	15000	8200	3600	554	75	046_Mz9_1	6390	520	522	44	1550	190	132	16	144	20	11.2	2.1	18.6	3.8	046_Mz9_1	0.55	0.14	147	18	111	17	120.6	8.3	8768.35	343.548
046_Mz14_1	64500	5600	146000	13000	18300	1600	59000	11000	11100	4000	713	82	046_Mz14_1	5820	410	317	33	592	49	23.4	3.1	13.3	3.4	0.96	0.51	0.91	0.7	046_Mz14_1	0.018	0.025	115	20	93	13	118	12	6767.59	6395.6
046_Mz14_3	64000	10000	141000	16000	16800	2200	54000	19000	15000	4600	630	120	046_Mz14_3	5670	470	305	24	601	78	29.5	8.6	34	15	1.42	0.88	4	2.6	046_Mz14_3	0.19	0.1	102	25	89	17	106	18	6645.11	1417.5
046_Mz14_4	55200	7200	137000	13000	17200	1700	56000	15000	10100	3800	440	45	046_Mz14_4	5980	470	610	40	3040	210	319	17	420	24	39	2.6	71.2	6.2	046_Mz14_4	2.39	0.36	82	17	64	7.2	83	9.3	10481.6	83.9888
046_Mz16_1	68700	8900	136000	11000	18900	2000	56000	17000	11000	4000	710	130	046_Mz16_1	5960	420	388	32	808	58	30.5	2.7	13	2.8	1.07	0.61	0.65	0.47	046_Mz16_1	-0.00019461	2.9e-07	111	18	120	10	129	14	7201.22	9169.23
046_Mz16_2	56500	6900	139300	7500	17000	1300	57000	17000	8800	3900	499	68	046_Mz16_2	6920	440	811	55	4210	310	449	30	618	41	52.2	5	100.7	7	046_Mz16_2	3.09	0.34	97	13	81	11	84	11	13164	68.719
046_Mz16_3	58500	8100	142000	14000	19200	1500	61000	14000	10900	4000	610	120	046_Mz16_3	5100	250	270	21	450	39	20.6	2.1	13.5	2.4	1.4	0.57	0.65	0.57	046_Mz16_3	0.042	0.034	167	23	158	18	118	10	5856.19	7846.15
046_Mz16_4	55200	6500	145000	12000	16500	1500	56000	17000	11100	3700	680	100	046_Mz16_4	6580	550	452	33	989	82	45.7	5.3	26.7	5.2	1.99	0.66	2.1	0.76	046_Mz16_4	0.009	0.018	110	20	103.8	7.9	112	11	8097.5	3133.33
046_Mz16_5	60600	7600	138000	15000	16600	1800	60000	10000	4800	2300	726	64	046_Mz16_5	6930	470	395	49	707	48	34.7	4	19.6	5.2	0.86	0.6	1.4	1	046_Mz16_5	0.039	0.042	86	17	85	11	116	13	8088.6	4950
052_Mz1_1	40200	7800	80000	8200	8700	1100	29500	9600	4500	2700	148	39	052_Mz1_1	4960	350	648	62	3120	220	347	19	488	36	37.3	4	63.5	5.4	052_Mz1_1	1.62	0.21	58	14	45.9	6.9	32.3	6	9665.42	78.1102
052_Mz1_2	30000	8100	71100	8600	8800	1000	19100	9700	4800	2200	113	37	052_Mz1_2	5240	360	645	32	3560	270	383	28	551	50	46	5.4	92.2	6.7	052_Mz1_2	2.64	0.41	52	17	37.8	7.8	51.9	5.7	10519.8	56.833
052_Mz1_3	37800	7800	78500	9700	9600	1100	42000	12000	4700	2600	129	35	052_Mz1_3	4870	350	593	49	3230	230	360	25	547	58	40	3.3	77.8	9.7	052_Mz1_3	2.33	0.36	51	11	36.5	9	48.8	9.9	9720.13	62.5964
052_Mz3_2	50300	7500	116000	16000	14500	1300	54000	14000	5900	3500	116	41	052_Mz3_2	8150	600	908	78	4270	260	378	20	413	25	25.9	3.5	33.8	3.8	052_Mz3_2	1.12	0.17	62	11	45.7	9.7	68	9	14179.8	241.124
052_Mz3_3	54800	9300	106800	8900	14500	1500	54000	19000	7700	2900	185	37	052_Mz3_3	8830	860	919	81	5300	340	510	38	612	35	37.4	3.4	64.7	5.1	052_Mz3_3	1.89	0.38	50	12	45.3	7.1	63.2	9.5	16275	136.476
052_Mz3_4	51300	9200	124300	9600	15100	1400	45000	12000	8300	3200	272	60	052_Mz3_4	6020	550	740	83	4110	270	509	44	747	44	73.3	5.9	152	14	052_Mz3_4	4.19	0.43	70	12	75.6	7.8	76.8	8.9	12355.5	39.6053
052_Mz3_5	43500	7200	110000	11000	13700	1600	42000	11000	9900	4500	189	34	052_Mz3_5	7370	660	876	89	5020	300	515	39	645	48	47.7	5.3	80.9	8.6	052_Mz3_5	2.32	0.29	78	16	76.4	7.9	57.5	7.8	14556.9	91.1001
052_Mz3_7	46300	9100	113000	11000	13500	1800	37000	12000	11200	3700	314	41	052_Mz3_7	5970	440	693	42	3840	220	458	31	722	62	71.7	6.8	150	13	052_Mz3_7	4.87	0.54	84	15	79	12	76	10	11909.6	39.8
052_Mz3_8	23600	5300	66000	11000	7400	1300	24700	8300	7000	3300	52	15	052_Mz3_8	3220	430	421	64	2340	300	276	36	400	57	32.7	5.9	64	11	052_Mz3_8	2.21	0.46	25	5.7	24.3	4.7	42.2	9.9	6755.91	50.3125
052_Mz3_10	61300	6200	111000	11000	15900	1500	39000	12000	11700	4500	88	37	052_Mz3_10	6370	520	727	54	3310	170	303	24	342	36	24	3.8	33.5	3.9	052_Mz3_10	0.95	0.25	57	18	38.7	8.2	61	13	11110.5	190.149
052_Mz5_1	53400	9000	122000	13000	16000	2500	68000	20000	18600	5500	671	79	052_Mz5_1	4430	450	232	38	660	63	37.7	4.1	33.4	7.4	4.9	1.7	4.8	1.4	052_Mz5_1	0.14	0.076	146	23	145	15	153	15	5402.94	922.917
052_Mz5_2	48000	6200	116000	11000	16600	1600	56000	13000	10600	4200	338	51	052_Mz5_2	5850	420	662	57	3730	220	488	28	770	44	67.5	6.7	149	12	052_Mz5_2	5.17	0.49	65.3	9.1	59.1	9.9	104.5	9.3	11721.7	39.2617
052_Mz5_3	45200	7000	130000	11000	14600	1600	69000	13000	17600	4000	332	47	052_Mz5_3	5960	460	562	45	3500	250	442	30	737	46	69.5	4	148	12	052_Mz5_3	5.01	0.42	76	13	64.7	9.7	93.4	9.5	11423.5	40.2703
052_Mz5_4	49200	6100	123000	11000	15000	1800	68000	15000	14100	4800	369	55	052_Mz5_4	6420	570	628	52	3510	460	404	46	690	100	57	10	128	17	052_Mz5_4	4.33	0.61	56	11	79.2	9.9	104	13	11841.3	50.1562
052_Mz6_1	54400	8100	125000	11000	14200	1300	58000	16000	10700	3600	229	62	052_Mz6_1	6720	490	672	48	3880	230	420	24	594	51	47.8	7.8	91	13	052_Mz6_1	3.13	0.48	59	12	58	10	101	13	12427.9	73.8462
052_Mz6_2	60300	5500	128000	10000	14500	1300	55000	16000	18300	4900	131	30	052_Mz6_2	6620	520	862	59	4880	380	568	44	784	63	65.8	5.7	113	13	052_Mz6_2	3.09	0.34	52	12	30.5	8.5	83.3	9.8	13895.9	58.5841
052_Mz6_3	53200	8300	116100	8700	14700	1300	64000	14000	9600	4100	280	58	052_Mz6_3	6730	340	723	56	3810	210	454	39	728	41	61	7.1	142	13	052_Mz6_3	4.46	0.45	71	14	51.7	8.3	93	14	12652.5	47.3944
TABLE 5. Trace element data with associated 2se errors continued													TABLE 5. Trace element data with associated 2se errors continued															TABLE 5. Trace element data with associated 2se errors continued
Spot location	La_ppm	2se	Ce_ppm	2se	Pr_ppm	2se	Nd_ppm	2se	Sm_ppm	2se	Eu_ppm	2se	Spot location	Gd_ppm	2se	Tb_ppm	2se	Dy_ppm	2se	Ho_ppm	2se	Er_ppm	2se	Tm_ppm	2se	Yb_ppm	2se	Spot location	Lu_ppm	2se	206Pb_ppm	2se	207Pb_ppm	2se	208Pb_ppm	2se	Total HREE	Gd/Yb
052_Mz8_1	55700	5300	129000	16000	14400	1700	64000	15000	11300	3800	440	79	052_Mz8_1	5980	630	515	39	2222	75	229	17	366	22	34.1	5	71.6	6.5	052_Mz8_1	2.3	0.25	85	14	60.6	6.5	103	13	9420	83.5196
052_Mz8_2	50800	8500	122000	11000	14100	1400	57000	14000	11600	4400	623	75	052_Mz8_2	6040	540	628	47	2810	200	295	30	356	39	23.2	4.1	46.6	5.9	052_Mz8_2	1.3	0.27	120	20	107	10	108	11	10200.1	129.614
052_Mz12_2	53800	5300	108000	12000	13100	1200	46500	9100	8900	3800	460	59	052_Mz12_2	6030	480	738	48	3680	240	465	27	692	42	69.4	8.6	140.8	9.1	052_Mz12_2	4.57	0.39	82	17	75	12	78.1	8.3	11819.8	42.8267
052_Mz12_3	43700	8000	101200	9300	13790	990	50000	15000	9000	3000	165	50	052_Mz12_3	6230	550	762	68	4330	280	512	40	706	40	61.6	5.4	107	11	052_Mz12_3	3.44	0.43	53	13	53.2	6	62.8	9.4	12712	58.2243
052_Mz14_1	55900	9300	116400	9100	14220	930	47000	11000	12900	3200	655	97	052_Mz14_1	6000	530	471	35	2030	130	173	11	196	14	12.6	1.8	22.5	3.5	052_Mz14_1	0.83	0.15	141	19	120	11	113	12	8905.93	266.667
052_Mz17_1	57600	7200	125000	15000	15500	1200	81000	16000	8400	3200	762	96	052_Mz17_1	5090	270	265	26	820	160	65	17	74	19	4.2	1.3	6.5	2	052_Mz17_1	0.199	0.076	165	33	181	17	143	16	6324.9	783.077
052_Mz17_2	50800	6900	125000	12000	14700	1900	56000	15000	15700	5300	229	45	052_Mz17_2	6360	470	698	74	3840	380	471	42	765	57	74.1	6.3	156	16	052_Mz17_2	4.54	0.54	57	12	53.5	9.3	111	10	12368.6	40.7692
052_Mz17_3	68000	10000	141000	14000	18300	2000	69000	21000	15100	6300	472	67	052_Mz17_3	7780	680	671	89	2440	370	265	42	336	55	30.6	6.7	45.4	6.6	052_Mz17_3	1.49	0.31	104	18	97	16	132	14	11569.5	171.366
052_Mz18_1	64000	10000	142000	11000	15930	970	74000	17000	13600	5000	1005	88	052_Mz18_1	6750	560	485	57	1270	140	71.6	6.8	60.3	7.6	3	1.1	3.4	1.1	052_Mz18_1	0.136	0.066	160	25	176	17	145	14	8643.44	1985.29
052_Mz18_2	59300	8600	136300	7800	17800	1900	73000	19000	17900	4700	588	96	052_Mz18_2	6640	710	410	31	1490	110	103.8	7.8	93	11	4.4	1.3	7	1.6	052_Mz18_2	0.24	0.13	181	32	148	13	132	21	8748.44	948.571
052_Mz18_3	56700	7200	128000	14000	16800	1800	65000	11000	13200	4700	98	36	052_Mz18_3	7060	540	773	47	4250	260	532	36	753	42	51.8	3.9	109	12	052_Mz18_3	3.04	0.35	57	12	36.8	6	97	10	13531.8	64.7706
052_Mz18_4	53000	7100	113000	13000	16500	2000	67000	19000	10200	3400	128	28	052_Mz18_4	7550	520	803	63	4620	370	537	46	767	59	57	4.7	114.3	8.4	052_Mz18_4	3.06	0.42	59	11	29.7	7.3	92	11	14451.4	66.0542
048_Mz1_1	42300	7500	100900	5800	10500	1600	44300	5500	7100	1100	502	73	048_Mz1_1	6760	940	649	82	2740	600	299	53	288	42	14.4	3.5	10.9	3.8	048_Mz1_1	0.36	0.13	710	210	50	22	112	30	10761.7	620.183
048_Mz1_2	55000	55000	120000	120000	13000	13000	56000	56000	8400	8400	530	530	048_Mz1_2	4900	4900	460	460	580	580	61	61	57	57	1.8	1.8	0.57	0.57	048_Mz1_2	0.067	0.067	1200	1200	53	53	110	110	6060.44	8596.49
048_Mz1_3	47100	9800	108000	23000	12000	3100	46400	5900	7800	1200	507	56	048_Mz1_3	5840	170	580	92	1300	120	130.1	7.7	119	33	4.8	1	2.8	1.7	048_Mz1_3	0.098	0.01	890	720	69.9	2.3	117	82	7976.8	2085.71
048_Mz1_4	50600	4500	124000	18000	7740	650	49000	11000	7800	440	488.6	9.1	048_Mz1_4	4000	720	420.9	6.4	530	110	55.3	5.9	48.9	2	2.23	0.23	2.8	1.7	048_Mz1_4	0.05332	0.00021	710	720	65	26	116	21	5060.18	1428.57
048_Mz1_5	49000	2900	125300	6500	13800	2100	51200	6300	7350	270	494	63	048_Mz1_5	3930	300	420	46	525	53	64	10	48	8.1	2.7	1.3	2.21	0.43	048_Mz1_5	0.0634	0.0049	980	900	58	17	120	10	4991.97	1778.28
048_Mz1_6	48000	48000	120000	120000	13000	13000	53000	53000	8400	8400	550	550	048_Mz1_6	5400	5400	630	630	1500	1500	140	140	130	130	6.5	6.5	5.3	5.3	048_Mz1_6	0.2	0.2	1200	1200	48	48	160	160	7812	1018.87
048_Mz1_7	52600	5000	114500	6900	8650	730	46800	8900	7700	1700	490.9	8.6	048_Mz1_7	4850	110	523	25	880	130	96	16	75	17	3.61	0.32	2.61	0.86	048_Mz1_7	0.116	0.084	1180	350	58	45	108	30	6430.34	1858.24
048_Mz1_8	49000	12000	117900	4100	11200	4600	45900	2200	7600	1200	539	68	048_Mz1_8	6600	1900	666	6	1820	430	198	32	182	23	9.07	0.5	6.0363	0.0012	048_Mz1_8	0.193414	8.4e-05	850	900	55	21	109	49	9481.3	1093.39
048_Mz1_9	51000	51000	110000	110000	8800	8800	46000	46000	8500	8500	530	530	048_Mz1_9	4600	4600	450	450	570	570	54	54	56	56	2.6	2.6	2.6	2.6	048_Mz1_9	0.077	0.077	110	110	72	72	79	79	5735.28	1769.23
048_Mz1_10	65700	6800	149000	13000	19200	1300	60700	2700	11160	220	647	33	048_Mz1_10	6340	700	662	16	1010	130	120.8	5.1	92.5	7	3.58	0.96	4.4	1.7	048_Mz1_10	0.0632	0.005	1520	890	92	28	128	29	8233.34	1440.91
048_Mz1_11	62800	4000	143000	17000	18690	660	59400	8800	10500	1100	693	24	048_Mz1_11	6100	1000	600	90	809	95	81.6	7.5	65	15	3.27	0.32	0.8	1.3	048_Mz1_11	0.043	0.016	600	360	61	19	133	39	7659.71	7625
048_Mz1_12	63400	3000	139200	7700	18400	2900	65400	2000	10400	550	715	15	048_Mz1_12	6260	600	726	66	863	63	93.4	5.3	81.1	3.2	3.6	1.1	4.03	0.87	048_Mz1_12	0.057	0.022	920	170	82	19	161	39	8031.19	1553.35
048_Mz6_1	63300	1800	150200	3400	21800	6000	64900	6600	10640	610	707	10	048_Mz6_1	5770	290	654	11	708	26	81	13	65.8	1.8	2.63	0.046	1.64	0.43	048_Mz6_1	0.0417	0.0051	1400	1100	69.4	7	144.7	9.4	7283.11	3518.29
048_Mz6_2	64000	10000	148000	18000	14500	6500	60000	12000	10710	970	750	150	048_Mz6_2	6800	1200	698	17	1060	130	115	16	94	23	4.8	1.1	2.5	1.3	048_Mz6_2	0.064	0.011	1330	530	71	9.4	185	77	8774.36	2720
048_Mz6_3	64100	8500	151000	13000	17800	1200	57800	8500	10110	520	654	72	048_Mz6_3	6310	290	653	85	920	120	102	20	86.9	4.9	4.2	1.1	3.4	2.4	048_Mz6_3	0.062	0.022	710	210	55	15	170	55	8079.56	1855.88
048_Mz6_4	60800	7400	152000	13000	15300	7400	62800	8100	10420	650	704	52	048_Mz6_4	8100	1400	918	94	1630	140	184	14	151	32	7.78	0.92	5.3	1.7	048_Mz6_4	0.1414	0.0049	1300	2000	85	26	164	47	10996.2	1528.3
048_Mz6_5	60600	5000	137000	11000	10630	610	57700	9600	10290	830	686	74	048_Mz6_5	8770	840	1019	81	2140	240	244	33	196	26	8.51	0.99	6.64	0.51	048_Mz6_5	0.185	0.048	1470	310	74	5.6	144	33	12384.3	1320.78
048_Mz6_6	55000	55000	130000	130000	9400	9400	55000	55000	9800	9800	610	610	048_Mz6_6	8700	8700	970	970	4900	4900	590	590	610	610	38	38	40	40	048_Mz6_6	0.86	0.86	1600	1600	40	40	95	95	15848.9	217.5
048_Mz7_1	67000	67000	150000	150000	18000	18000	64000	64000	11000	11000	670	670	048_Mz7_1	5600	5600	690	690	640	640	73	73	51	51	1.8	1.8	2.8	2.8	048_Mz7_1	0.032	0.032	1600	1600	68	68	68	68	7058.63	2000
048_Mz7_2	58000	58000	140000	140000	10000	10000	56000	56000	10000	10000	650	650	048_Mz7_2	8900	8900	980	980	4300	4300	510	510	550	550	33	33	39	39	048_Mz7_2	1.1	1.1	1600	1600	53	53	120	120	15313.1	228.205
048_Mz7_3	63800	1500	160000	25000	11090	930	60200	2800	10760	470	701	78	048_Mz7_3	6130	90	700	65	700	120	77.2	5.6	60	19	2.89	0.69	2.35	0.43	048_Mz7_3	0.062	0.027	880	710	85	16	209	56	7672.5	2608.51
048_Mz7_4	64400	2300	149000	12000	10527	75	58200	5100	10200	1400	661	67	048_Mz7_4	6150	560	716	25	845	72	88	12	64	19	3.04	0.79	3.41	0.87	048_Mz7_4	0.076	0.017	880	710	62	21	161	74	7869.53	1803.52
048_Mz7_5	65000	65000	150000	150000	18000	18000	58000	58000	11000	11000	740	740	048_Mz7_5	9000	9000	1200	1200	2200	2200	250	250	190	190	9.7	9.7	7.7	7.7	048_Mz7_5	0.16	0.16	1100	1100	77	77	150	150	12857.6	1168.83
048_Mz7_6	57840	340	135800	7300	17700	2200	62000	10000	10800	1300	678	80	048_Mz7_6	6070	570	690	150	692.8	4.8	75.1	5.4	60.2	3.5	2.5	1.3	1.8	1.3	048_Mz7_6	0.062	0.038	1500	180	71	2.4	149	18	7592.46	3372.22
TABLE 5. Trace element data with associated 2se errors continued													TABLE 5. Trace element data with associated 2se errors continued															TABLE 5. Trace element data with associated 2se errors continued
Spot location	La_ppm	2se	Ce_ppm	2se	Pr_ppm	2se	Nd_ppm	2se	Sm_ppm	2se	Eu_ppm	2se	Spot location	Gd_ppm	2se	Tb_ppm	2se	Dy_ppm	2se	Ho_ppm	2se	Er_ppm	2se	Tm_ppm	2se	Yb_ppm	2se	Spot location	Lu_ppm	2se	206Pb_ppm	2se	207Pb_ppm	2se	208Pb_ppm	2se	Total HREE	Gd/Yb
048_Mz9_1	63200	4100	140400	3400	10760	950	53800	3600	10690	710	729.5	6.5	048_Mz9_1	7920	310	838	37	1335	83	142.2	5.7	122.2	7.7	5.11	0.93	4.8	1.3	048_Mz9_1	0.124	0.033	1060	710	75	26	149	91	10367.4	1650
048_Mz9_2	59400	6200	140000	14000	18000	13000	59000	8200	10840	180	723	14	048_Mz9_2	7110	770	755	35	841	19	79.3	1.7	75	16	2.98	0.19	4.1	1.7	048_Mz9_2	0.0766	0.0055	1230	710	115	19	166.903	0.0075	8867.46	1734.15
048_Mz9_3	67900	6400	151400	8500	19000	1600	58300	4100	10585	87	668	43	048_Mz9_3	5790	780	700	100	613	56	67.6	7.6	54.4	2.6	2.19	0.74	1.44	0.29	048_Mz9_3	0.037	0.018	1400	700	82	18	178	38	7228.67	4020.83
048_Mz9_4	66100	1400	139000	24000	18200	3600	50100	7900	9700	1300	559	78	048_Mz9_4	5330	910	642.6	9.7	610	110	65	13	53.81	0.34	2.82	0.33	2.29	0.43	048_Mz9_4	0.0764	0.0055	1490	530	63	25	146.5	9	6706.6	2327.51
048_Mz9_5	61540	960	154000	13000	11980	360	54800	7800	10120	530	660	130	048_Mz9_5	5375	43	640	100	629	47	72	15	57.2	9.7	3	1.6	1.47	0.44	048_Mz9_5	0.052	0.044	1753.85	0.029	80.5397	0.0036	169	36	6777.72	3656.46
048_Mz9_6	60400	2300	142000	11000	19330	440	55800	5800	10500	2500	691	38	048_Mz9_6	6550	980	684	65	758	16	86.14	0.22	72.8	0.34	3.13	0.37	2.14458	0.00085	048_Mz9_6	0.069	0.044	1400	1100	92	37	204	36	8156.28	3054.21
048_Mz9_7	63800	1800	151000	15000	19200	2000	54000	12000	10800	1500	660	32	048_Mz9_7	6160	880	711	67	744	9.2	79.9	5.4	63.7	5.5	3.35	0.42	2.6	2.6	048_Mz9_7	0.0606	0.0055	1400	1100	82	58	199	45	7764.61	2369.23
048_Mz9_8	65700	9500	148000	24000	20300	1300	58500	5500	10700	1300	656	29	048_Mz9_8	6040	170	678	77	688	35	80	15	64.5	7.7	2.62	0.37	2.8	1.3	048_Mz9_8	0.064	0.022	1310	180	94	11	180	63	7555.98	2157.14
048_Mz9_9	60510	240	151700	6200	21980	370	52600	9800	10400	1500	634	66	048_Mz9_9	6410	810	704	53	790	140	82	17	69.8	7.9	2.98	0.71	1.7	1.3	048_Mz9_9	0.075	0.061	2100	1800	57	35	157.3	8.7	8060.55	3770.59
048_Mz9_10	59600	6400	173000	40000	23200	1200	52700	3100	9900	1100	665	87	048_Mz9_10	7200	1300	874.2	8.3	1229	92	146	23	119.1	4.9	5.3	1.1	5.1	3	048_Mz9_10	0.136	0.017	1120	880	72.9	4.5	147.1	8.7	9578.84	1411.76
048_Mz9_11	63400	2200	149000	29000	25500	2000	52600	2800	10940	580	660	130	048_Mz9_11	5640	190	714	34	680	120	72.7	8.5	58.4	3.2	2.26	0.19	1.2	0.43	048_Mz9_11	0.063	0.039	1640	530	74.6	2.3	150	18	7168.62	4700
048_Mz9_12	59400	2400	147100	2800	25600	1600	55100	6600	10600	1400	661	60	048_Mz9_12	6210	590	740	150	670	100	73.7	9.4	57.4	3.7	2.06	0.42	3.01	0.49	048_Mz9_12	0.048	0.036	1550	880	70	18	115	36	7756.22	2063.12
048_Mz9_13	64300	6600	151000	17000	24900	4700	57300	7100	11600	2000	700	110	048_Mz9_13	6200	370	800	130	662	12	74	10	52.8	4.9	2.19	0.71	1.71	0.84	048_Mz9_13	0.062	0.062	2080	350	99.3	2.4	160	26	7792.76	3625.73
048_Mz9_14	61600	4700	140700	2400	28900	3800	52600	5100	10500	850	725	17	048_Mz9_14	10200	1100	1286	63	2730	150	319.2	1.9	263.1	5	12.56	0.38	8.54	0.42	048_Mz9_14	0.242	0.04	1570	350	61.9	4.6	170	17	14819.6	1194.38
048_Mz9_15	59900	3500	146000	16000	18000	1300	50500	4700	10260	840	714	92	048_Mz9_15	11700	2000	1333	13	3100	340	329	37	285	51	13.64	0.14	11.7	1.7	048_Mz9_15	0.33	0.13	960	520	65	48	138.3	8.8	16772.7	1000
048_Mz9_16	60900	8400	135000	25000	27400	1300	54300	6400	10530	220	720	240	048_Mz9_16	12300	1100	1396	50	4180	180	448	51	426	39	21.3	2.8	22.2	7.5	048_Mz9_16	0.575	0.091	1800	1200	79	6.9	116	35	18794.1	554.054
048_Mz9_17	62000	4300	145000	20000	17600	2000	58000	6200	10900	1400	770	110	048_Mz9_17	12800	2100	1408	58	3580	510	414	21	387	40	20.1	1.8	11.5	3.8	048_Mz9_17	0.43	0.2	1120	520	77	11	128	26	18621	1113.04
048_Mz9_18	63200	2700	149000	16000	14800	1500	58500	8600	10680	370	745	54	048_Mz9_18	12800	1200	1478	40	4060	250	436	65	433	73	22.7	1.6	19.7	1.2	048_Mz9_18	0.6	0.023	920.9	1.6	64	25	128	17	19250	649.746
048_Mz9_19	60700	8200	137700	9100	23200	3200	53600	2600	10930	760	729	82	048_Mz9_19	12260	900	1400	190	4480	300	459	16	494	81	28.1	2.3	25.6	2.1	048_Mz9_19	0.757	0.074	820	170	58.9	2.3	128	35	19147.5	478.906
048_Mz9_20	62000	62000	140000	140000	21000	21000	62000	62000	11000	11000	690	690	048_Mz9_20	6300	6300	770	770	780	780	89	89	80	80	3.4	3.4	4.1	4.1	048_Mz9_20	0.1	0.1	1700	1700	80	80	140	140	8026.6	1536.59
048_Mz9_21	62000	62000	160000	160000	20000	20000	57000	57000	12000	12000	720	720	048_Mz9_21	11000	11000	1100	1100	3200	3200	340	340	310	310	16	16	13	13	048_Mz9_21	0.42	0.42	1200	1200	71	71	110	110	15979.4	846.154
048_Mz9_22	61300	9100	158000	26000	18300	1600	59700	9100	11490	520	759	86	048_Mz9_22	10000	1400	1150	140	2190	200	254	12	201	55	9.4	1.2	5.7	3.8	048_Mz9_22	0.176	0.064	1300	170	80	55	129	35	13810.3	1754.39
048_Mz9_23	64200	6000	148900	3300	18800	1500	59400	9500	12500	1200	766	43	048_Mz9_23	6890	740	890	110	1059.6	9.4	125	27	93.3	9	5.27	0.72	2.66	0.83	048_Mz9_23	0.122	0.053	870	350	83	11	111.867	0.048	9065.95	2590.23
048_Mz9_24	62000	12000	141800	7500	11160	840	58500	9900	12530	320	726	7.2	048_Mz9_24	6960	290	763.5	5.2	738.3	3.3	84.8	2.2	62.8	2.9	2.72	0.53	1.07	0.85	048_Mz9_24	0.063	0.029	1130	870	77	50	142.3	8.6	8613.25	6504.67
048_Mz9_25	68200	8200	149000	14000	15900	4700	57500	5400	12000	1700	714	64	048_Mz9_25	7200	1100	830	150	900	110	96	14	77	14	3.39	0.17	1.7	1.6	048_Mz9_25	0.068	0.034	1270	500	80	16	132	37	9108.16	4235.29
048_Mz9_26	61900	5300	150400	7000	18600	2400	57000	7500	12200	1200	625	15	048_Mz9_26	6460	340	729	50	756	74	85.5	9.7	69.1	5.3	3	2	2.3	1.3	048_Mz9_26	0.032	0.012	430	520	85	14	150	26	8104.93	2808.7
048_Mz9_27	70100	6700	159000	7800	19900	2700	58300	4100	11200	610	614	20	048_Mz9_27	6000	1100	700	150	686	96	69.8	8.2	50.8	4.1	2.1	0.44	1.68	0.84	048_Mz9_27	0.049	0.03	1381.14	0.037	78	20	152	51	7510.43	3571.43
048_Mz9_28	66000	66000	150000	150000	22000	22000	57000	57000	13000	13000	630	630	048_Mz9_28	5900	5900	680	680	700	700	70	70	53	53	3.8	3.8	0.82	0.82	048_Mz9_28	0.064	0.064	2100	2100	64	64	84	84	7407.68	7195.12
048_Mz9_29	62700	8100	164000	11000	22700	2500	57000	13000	12470	260	613	93	048_Mz9_29	5882	91	662	60	667	73	72.1	2.8	60	10	2.8	1.3	2.7	1.3	048_Mz9_29	0.088	0.024	1380	340	88	13	189	25	7348.69	2178.52
048_Mz9_30	64000	6000	192000	50000	13940	550	53700	1900	12200	1900	581	48	048_Mz9_30	5690	900	630	130	648	45	78	11	64.3	5.9	2.6	0.24	2.7	2.1	048_Mz9_30	0.043	0.03	1290	170	81	2.4	188.8	8.4	7115.64	2107.41
048_Mz9_31	60200	9000	150000	18000	23000	3500	53100	6800	11150	950	567	84	048_Mz9_31	5380	860	590	87	619	83	70	13	55.9	7.3	2.7	0.76	2.23	0.73	048_Mz9_31	0.057	0.023	1720	700	82	11	122	16	6719.89	2412.56
048_Mz9_32	59900	1700	132300	1700	25700	3600	59300	6900	11380	920	630	110	048_Mz9_32	6470	790	730	140	872	79	93.7	6.7	78	20	3.16	0.29	2.24	0.42	048_Mz9_32	0.0834	0.0059	670	690	89.9	6.7	197.5	8.3	8249.18	2888.39
048_Mz9_33	68000	68000	150000	150000	28000	28000	65000	65000	13000	13000	630	630	048_Mz9_33	6300	6300	700	700	690	690	89	89	61	61	2.6	2.6	3.3	3.3	048_Mz9_33	0.069	0.069	1800	1800	48	48	110	110	7845.97	1909.09
048_Mz9_34	61800	3800	141000	26000	31800	1700	58800	9400	12850	650	640	100	048_Mz9_34	5980	160	692	63	717	53	76	8.4	58.5	4.3	2.73	0.68	2	2.5	048_Mz9_34	0.043	0.018	1440	340	63	12	154	49	7528.27	2990
048_Mz9_35	69000	15000	149000	31000	33890	280	64600	4600	12990	770	708	87	048_Mz9_35	6430	850	690	110	687	48	77	15	58	10	2.44	0.59	3.28	0.84	048_Mz9_35	0.068	0.042	2100	1700	54	18	134	24	7947.79	1960.37
048_Mz9_36	64100	9100	153100	9800	35200	3000	68200	5500	13800	2600	690	110	048_Mz9_36	6450	420	700	130	760	190	78.8	9.2	60.7	9.4	2.57	0.83	2.03	0.84	048_Mz9_36	0.07996	0.00027	1050	510	65.2	4.7	137	97	8054.18	3177.34
TABLE 5. Trace element data with associated 2se errors continued													TABLE 5. Trace element data with associated 2se errors continued															TABLE 5. Trace element data with associated 2se errors continued
Spot location	La_ppm	2se	Ce_ppm	2se	Pr_ppm	2se	Nd_ppm	2se	Sm_ppm	2se	Eu_ppm	2se	Spot location	Gd_ppm	2se	Tb_ppm	2se	Dy_ppm	2se	Ho_ppm	2se	Er_ppm	2se	Tm_ppm	2se	Yb_ppm	2se	Spot location	Lu_ppm	2se	206Pb_ppm	2se	207Pb_ppm	2se	208Pb_ppm	2se	Total HREE	Gd/Yb
048_Mz9_37	63000	11000	148000	16000	30600	2800	59200	3800	12000	2100	670	52	048_Mz9_37	6269	94	674	44	700	110	85.9	9.8	61.8	2.2	2.72	0.34	2.3	2.1	048_Mz9_37	0.059	0.024	1070	520	78.9	6.9	141	56	7795.78	2725.65
048_Mz9_38	59560	690	145000	14000	30400	3300	60400	6400	11800	1800	588	30	048_Mz9_38	5800	750	680	160	710	110	74	14	55	14	3.014	0.049	1.4	1.2	048_Mz9_38	0.07	0.018	1010	690	63	31	92	40	7323.48	4142.86
048_Mz9_39	60900	3600	156000	11000	15200	1100	59900	3800	11300	3700	590	100	048_Mz9_39	5730	680	640	110	667	88	71.5	3.6	57	4.4	2.4	1.1	2.7	1.3	048_Mz9_39	0.084	0.012	900	1700	81	11	161	55	7170.68	2122.22
048_Mz9_40	59500	9200	158000	24000	23900	2900	70200	3600	11810	640	663	25	048_Mz9_40	6600	1200	728	85	784.5	5.7	85.8	1.6	64.2	2.4	3.12	0.84	1.7	2.1	048_Mz9_40	0.09	0.019	1460	510	51	43	132	47	8267.41	3882.35
048_Mz9_41	55200	9200	138000	18000	18100	3000	63100	8600	10800	1100	691	48	048_Mz9_41	11980	950	1230	59	6490	630	719	55	730	110	45.7	1.6	41.4	5.4	048_Mz9_41	1.439	0.086	1110	510	71	20	91	47	21237.5	289.372
048_Mz9_42	57000	57000	210000	210000	12000	12000	64000	64000	11000	11000	630	630	048_Mz9_42	8000	8000	960	960	2200	2200	270	270	290	290	14	14	14	14	048_Mz9_42	0.49	0.49	1200	1200	63	63	140	140	11748.5	571.429
048_Mz9_43	54500	4200	135000	10000	10850	190	57900	8000	10300	2300	632	77	048_Mz9_43	9700	2100	1010	280	3800	1100	410	130	450	130	30.9	9.9	28	15	048_Mz9_43	0.96	0.28	770	510	44	16	123.5	7.8	15429.9	346.429
051_Mz1_1	70000	11000	146000	11000	19400	1800	57000	12000	10500	3400	518	94	051_Mz1_1	8290	580	881	53	4870	260	599	29	1105	49	121	8.4	354	21	051_Mz1_1	13.54	0.93	61	10	53.4	5.5	83.2	6.5	16233.5	23.4181
051_Mz1_2	71000	14000	159000	15000	18700	2100	58000	14000	9100	4300	296	32	051_Mz1_2	9160	320	1004	66	5470	270	652	36	1038	55	101	14	233	24	051_Mz1_2	9.4	0.95	47.6	8.1	63	12	83.6	8.4	17667.4	39.3133
051_Mz1_3	63000	9600	135400	9500	18100	1800	70000	13000	16900	4200	259	26	051_Mz1_3	8240	470	957	65	5290	270	606	29	1042	74	120	12	289	29	051_Mz1_3	11.1	1.3	63	11	56.9	9	83.2	9.2	16555.1	28.5121
051_Mz5_1	75000	10000	131000	11000	17900	1400	51600	9800	9900	3600	250	20	051_Mz5_1	8600	540	950	80	5410	380	624	38	964	66	106.1	7.7	256	19	051_Mz5_1	10.7	1.1	62	12	54	10	73	11	16920.8	33.5938
051_Mz5_2	69000	11000	143000	11000	17300	1700	54000	13000	17400	5100	328	37	051_Mz5_2	9120	570	1014	71	5510	350	647	35	947	48	78.1	7.5	198	17	051_Mz5_2	6.08	0.61	62	16	51.3	7.7	86	13	17520.2	46.0606
051_Mz5_3	67600	5800	137000	12000	17100	1700	60000	15000	12900	3800	851	63	051_Mz5_3	8490	660	955	72	5940	350	727	50	1240	110	135.2	8	319	21	051_Mz5_3	12.3	1.3	74	15	56.1	9.4	82	11	17818.5	26.6144
051_Mz6_1	60800	9700	115000	12000	15700	1800	58000	18000	7900	2800	401	37	051_Mz6_1	7500	630	883	46	5230	310	609	43	955	88	75.5	7	176	15	051_Mz6_1	5.86	0.82	56	12	61	10	79	15	15434.4	42.6136
051_Mz6_2	71200	8600	148900	9700	19200	1300	57000	13000	12200	4000	832	49	051_Mz6_2	9410	670	1168	82	7200	430	832	63	1307	66	120.8	9.5	262	22	051_Mz6_2	8.83	0.77	103	18	78	10	93	14	20308.6	35.916
051_Mz6_3	65000	11000	139000	16000	16500	1300	66000	17000	15700	5600	790	45	051_Mz6_3	8880	710	1159	77	6650	440	773	51	1325	71	125.3	8.3	281	16	051_Mz6_3	9.77	0.92	84	11	59.6	9	90	13	19203.1	31.6014
051_Mz6_5	63900	6700	151000	12000	16400	1700	63000	16000	10200	3100	1000	88	051_Mz6_5	10460	830	1180	120	7420	740	765	80	1240	120	110.2	7.8	217	26	051_Mz6_5	7.58	0.99	109	18	73	11	90	12	21399.8	48.2028
051_Mz10_1	60000	11000	129000	12000	16800	2000	56000	16000	4800	3200	690	70	051_Mz10_1	8830	530	1092	72	6650	380	767	37	1247	76	121	14	247	24	051_Mz10_1	8.76	0.79	119	19	85	10	100	13	18962.8	35.749
051_Mz10_2	64500	9000	151000	13000	18800	1600	72000	18000	12200	3700	671	60	051_Mz10_2	9570	770	1060	69	6590	390	760	41	1105	52	100.4	6.9	203	14	051_Mz10_2	7.74	0.63	94	20	86.3	9.4	87.3	7.7	19396.1	47.1429
051_Mz10_3	64400	9000	143000	12000	17800	1500	66000	15000	17400	5100	283	31	051_Mz10_3	9820	560	1161	75	6370	390	757	43	966	83	72.1	5.4	129	13	051_Mz10_3	3.95	0.37	64	13	46.5	7.6	84.1	9.8	19279	76.124
051_Mz10_4	61400	8500	149000	14000	17500	1700	63000	15000	18700	5300	313	34	051_Mz10_4	9890	510	1217	73	6970	470	754	58	967	56	67.6	8.1	95.8	5.8	051_Mz10_4	3.21	0.31	66	15	45.7	7.5	86.1	7.7	19964.6	103.236
051_Mz11_1	68000	13000	139000	14000	18000	1600	56000	12000	14000	5000	676	74	051_Mz11_1	9000	820	911	63	3920	390	344	32	393	48	30.6	4.6	44.2	9.7	051_Mz11_1	1.32	0.36	103	17	90	15	125.2	9.4	14644.1	203.62
051_Mz11_2	74600	9300	152000	16000	20600	1700	57000	13000	10500	3400	706	61	051_Mz11_2	8740	720	964	83	4500	360	415	37	553	49	42	5.1	89	10	051_Mz11_2	2.79	0.46	126	22	92	13	129	17	15305.8	98.2022
051_Mz11_3	72000	12000	162000	14000	21600	2700	81000	17000	16600	4800	667	65	051_Mz11_3	8840	840	925	60	3900	320	323	22	319	28	20.9	3.8	32.8	3.8	051_Mz11_3	0.99	0.12	105	12	104	15	139	17	14361.7	269.512
051_Mz11_4	67700	9700	143000	16000	16400	2300	39000	11000	9300	4800	597	41	051_Mz11_4	7640	610	790	52	3260	240	277	21	285	23	19.2	3.1	25.5	2.1	051_Mz11_4	0.77	0.17	99	22	93	13	110	16	12297.5	299.608
051_Mz11_5	78000	14000	169000	19000	21900	1800	78000	21000	16000	6900	821	80	051_Mz11_5	10800	1100	1202	82	5070	410	477	39	531	61	42.2	5.9	65	15	051_Mz11_5	1.89	0.3	133	23	88	13	113	12	18189.1	166.154
051_Mz11_6	72000	10000	156000	16000	17600	1900	65000	13000	9800	3800	623	50	051_Mz11_6	10220	910	1094	98	4940	440	501	61	650	110	44.5	9.3	76	17	051_Mz11_6	2.57	0.71	87	18	96	11	112	11	17528.1	134.474
051_Mz11_7	72000	10000	147000	12000	17900	1900	73000	14000	8200	3000	454	42	051_Mz11_7	9220	560	1000	68	4650	270	509	31	606	42	50.8	3.9	71.2	5.9	051_Mz11_7	2.03	0.22	92	16	71	13	100	11	16109	129.494
051_Mz11_8	86000	20000	202000	41000	21900	4400	74000	35000	13500	9100	780	110	051_Mz11_8	9810	900	1088	97	3930	390	388	25	380	23	23.4	7.4	34.3	8.1	051_Mz11_8	0.77	0.25	132	24	123	28	160	20	15654.5	286.006
051_Mz11_9	73000	12000	145000	18000	18500	2100	70000	16000	10800	4000	642	68	051_Mz11_9	8670	650	858	56	3390	240	319	22	309	16	21	2.7	31.9	3.7	051_Mz11_9	0.79	0.17	117	17	94	10	127	16	13599.7	271.787
051_Mz11_10	78000	10000	160000	20000	18300	1400	63000	19000	13100	3500	596	65	051_Mz11_10	8550	560	852	69	3260	230	308	24	325	27	19.8	2.2	32.2	2.9	051_Mz11_10	0.96	0.24	121	18	97	18	123	13	13348	265.528
051_Mz11_11	70900	9300	169000	14000	19900	2200	53000	13000	11700	3200	694	54	051_Mz11_11	9240	580	977	79	3680	290	333	21	315	29	18.4	2.2	26.7	3.5	051_Mz11_11	0.9	0.16	90	13	97	10	119	11	14591	346.067
051_Mz11_12	73000	11000	162000	12000	18800	1300	62000	17000	13400	4200	729	69	051_Mz11_12	9620	680	978	71	3970	230	344	29	383	35	26.6	4	34.9	4.1	051_Mz11_12	1.01	0.17	100	18	99	12	117	14	15357.5	275.645
051_Mz11_13	62500	9600	144000	15000	17800	1800	78000	18000	10900	3700	802	64	051_Mz11_13	10700	730	1103	98	5340	390	591	44	816	88	59.4	6.7	113	12	051_Mz11_13	3.73	0.56	92	17	84.5	8.7	125	10	18726.1	94.6903
051_Mz11_14	68000	11000	170000	14000	17900	2300	77000	20000	10200	4300	611	49	051_Mz11_14	8230	580	815	59	3220	260	303	22	306	28	19.3	2.3	28	5	051_Mz11_14	0.9	0.23	110	13	87	13	118	15	12922.2	293.929
051_Mz11_15	78000	11000	144000	14000	18900	2000	70000	11000	16000	5400	682	59	051_Mz11_15	9400	640	1079	85	5950	280	776	45	1250	70	113	8.5	239	19	051_Mz11_15	8.08	0.73	86	16	76.7	9.8	96	12	18815.1	39.3305
TABLE 5. Trace element data with associated 2se errors continued													TABLE 5. Trace element data with associated 2se errors continued															TABLE 5. Trace element data with associated 2se errors continued
Spot location	La_ppm	2se	Ce_ppm	2se	Pr_ppm	2se	Nd_ppm	2se	Sm_ppm	2se	Eu_ppm	2se	Spot location	Gd_ppm	2se	Tb_ppm	2se	Dy_ppm	2se	Ho_ppm	2se	Er_ppm	2se	Tm_ppm	2se	Yb_ppm	2se	Spot location	Lu_ppm	2se	206Pb_ppm	2se	207Pb_ppm	2se	208Pb_ppm	2se	Total HREE	Gd/Yb
051_Mz11_16	60800	8000	143000	14000	19500	2100	71000	15000	18500	5900	289	29	051_Mz11_16	9950	760	1247	94	6470	460	835	72	1130	110	86.6	8.3	156	13	051_Mz11_16	4.56	0.43	73	13	46.2	6.6	98	13	19879.2	63.7821
051_Mz11_17	73000	11000	147000	14000	18500	2000	66000	11000	14400	5800	418	52	051_Mz11_17	8760	950	990	130	4940	790	510	110	680	170	46	13	79	24	051_Mz11_17	2.36	0.74	81	17	68	12	114	11	16007.4	110.886
055_Mz1_1	70000	11000	153000	12000	19000	2000	54000	15000	13400	4100	195	32	055_Mz1_2	13200	1000	1370	100	6150	440	495	27	405	35	19.1	2.3	26.5	3.2	055_Mz1_2	0.4	0.12	108	16	114	16	127	16	21666	498.113
055_Mz1_2	65800	9100	160000	12000	18900	2200	83000	15000	17100	5600	166	21	055_Mz1_4	10490	550	1067	63	5820	450	626	33	825	35	51.6	4.9	93	8	055_Mz1_4	2.87	0.27	82	15	60.7	6.3	119	11	18975.5	112.796
055_Mz1_4	69000	11000	153000	16000	19300	2000	69000	11000	14500	4500	313	44	055_Mz1_5	9310	540	1101	36	6450	400	745	42	1104	57	89.2	7.4	170	9.5	055_Mz1_5	5.46	0.45	89	12	58	8.8	138	14	18974.7	54.7647
055_Mz1_5	70000	10000	145000	14000	18800	2100	65000	14000	11800	3400	274	34	055_Mz1_6	9800	660	1065	71	6270	500	723	55	1035	85	87.4	7.5	162	15	055_Mz1_6	5.45	0.39	62	12	60	11	143	17	19147.9	60.4938
055_Mz1_6	89000	20000	176000	20000	24000	3300	85000	49000	26400	4700	321	47	055_Mz1_7	13800	1300	1380	120	8030	570	960	97	1384	49	89.7	3.5	162	26	055_Mz1_7	5.28	0.72	98	31	65	21	122	17	25811	85.1852
055_Mz1_7	81000	11000	158000	13000	20200	1900	94000	17000	17300	5700	177	20	055_Mz1_8	10280	560	1133	80	5870	300	623	37	725	56	44.3	5.3	78.3	8.1	055_Mz1_8	2.13	0.36	85	16	61	11	143	16	18755.7	131.29
055_Mz1_8	76000	11000	157000	10000	19500	1500	74000	20000	15600	3700	277	34	055_Mz1_9	10390	920	1092	70	6960	370	763	40	1108	50	81.8	7.4	159	12	055_Mz1_9	4.96	0.48	84	14	59	12	122	14	20558.8	65.3459
055_Mz1_9	74500	9000	168000	16000	19300	2200	63000	19000	11200	4400	349	31	055_Mz1_10	11760	790	1189	70	6530	400	609	40	790	54	51.3	4.9	90.2	7.9	055_Mz1_10	2.85	0.37	100	16	87	12	141	14	21022.3	130.377
055_Mz1_10	85900	8700	170000	21000	21300	2000	84000	22000	12000	4300	360	31	055_Mz1_11	12900	1200	1410	140	8040	480	945	74	1304	77	109.8	9.9	194	12	055_Mz1_11	6.48	0.82	93	28	58	13	163	16	24909.3	66.4948
055_Mz1_11	75000	14000	159000	15000	19900	2200	64000	13000	10900	4500	316	29	055_Mz1_12	9880	780	1060	60	6370	340	754	46	1025	49	80.7	8.5	145	16	055_Mz1_12	4.95	0.56	92	16	60	10	139	12	19319.7	68.1379
055_Mz1_12	76000	10000	151000	14000	20800	2300	81000	26000	21000	3900	155	17	055_Mz1_13	9920	610	1089	60	6840	250	726	42	949	76	75.3	6.8	120	10	055_Mz1_13	4	0.54	79	19	45	11	117	20	19723.3	82.6667
055_Mz1_13	76000	10000	162000	12000	22900	1900	69000	13000	14900	4900	510	32	055_Mz1_14	9630	890	739	61	2920	250	210	15	222	23	13	1.7	23.8	4.3	055_Mz1_14	0.65	0.17	87	15	107	11	143	16	13758.4	404.622
055_Mz1_14	50000	11000	131000	17000	15900	1700	68000	23000	11100	8400	205	62	055_Mz18_1	8520	520	1019	73	5810	500	697	45	1027	79	81	10	155	19	055_Mz18_1	4.72	0.58	44	18	34.3	4.4	146	27	17313.7	54.9677
055_Mz18_1	81000	12000	170000	14000	20100	2900	63000	21000	11700	6300	157	20	055_Mz18_2	9370	790	892	69	5350	320	652	46	869	59	64.8	7.2	116.8	9.3	055_Mz18_2	3.74	0.52	81	14	45	10	127	14	17318.3	80.2226
055_Mz18_2	72000	12000	142000	15000	19800	1900	48000	17000	17800	6400	155	19	055_Mz18_3	9850	460	1032	84	6380	460	753	33	1096	75	82	6.9	147	15	055_Mz18_3	4.74	0.55	64	16	54.7	9	139	15	19344.7	67.0068
055_Mz18_3	60500	6100	131000	13000	18300	2700	73000	17000	9200	5100	151	33	055_Mz18_4	10350	740	1019	89	5930	380	659	28	788	62	51.4	8.8	83.8	7.9	055_Mz18_4	3.37	0.84	56	14	48	13	121	12	18884.6	123.508
055_Mz18_4	71000	12000	160000	15000	19500	2400	68000	15000	10800	4100	181	18	055_Mz8_1	9750	630	1067	72	6180	490	737	50	940	65	77	7.1	139	13	055_Mz8_1	3.89	0.39	66	11	54.9	6.2	137	18	18893.9	70.1439
055_Mz8_1	76000	13000	157000	14000	19300	2200	62000	15000	11900	5300	308	28	055_Mz8_2	12030	750	1483	95	8450	600	857	51	1143	73	94	10	166	12	055_Mz8_2	5.01	0.33	94	19	75	11	101	11	24228	72.4699
055_Mz8_2	16400	9400	38200	9800	4100	1600	6900	8800	3800	4800	52	35	055_Mz8_3	2850	660	304	79	1720	400	181	44	218	78	17.7	9.8	32	13	055_Mz8_3	1.08	0.37	191	33	194	39	78	30	5323.78	89.0625
055_Mz8_3	80000	9800	168000	15000	21000	1600	59000	12000	19100	4800	320	36	055_Mz8_4	12430	880	1430	110	8340	510	928	67	1205	58	85.2	6.2	156	13	055_Mz8_4	5.6	0.54	94	13	70	12	116	12	24579.8	79.6795
055_Mz8_4	84000	11000	204000	17000	22800	2700	75000	28000	25300	5700	308	37	055_Mz9_1	13540	990	1582	70	8870	590	922	45	1297	67	93.1	9.2	180	24	055_Mz9_1	4.85	0.31	114	38	72	16	102	17	26488.9	75.2222
055_Mz9_1	66000	23000	112000	34000	13000	2500	74000	15000	13200	9300	209	29	055_Mz9_2	6210	740	672	82	4420	350	508	30	702	41	56	12	108	11	055_Mz9_2	4.21	0.59	96	25	48	20	69	19	12680.2	57.5
055_Mz9_2	73000	14000	147100	9000	18800	1100	60000	15000	11600	3400	230	30	055_Mz9_3	10510	890	1123	69	5540	220	554	26	570	38	37.5	3.9	54.7	5.1	055_Mz9_3	1.52	0.22	93	20	67	9.2	137	17	18390.7	192.139
055_Mz9_3	77000	11000	163000	19000	21300	2600	64000	21000	18400	8800	361	45	055_Mz9_4	11790	900	1246	77	7060	480	803	50	1023	64	89	14	140	15	055_Mz9_4	4.52	0.43	94	23	79	16	132	19	22155.5	84.2143
055_Mz9_4	74000	13000	143000	14000	17600	2800	45000	19000	6300	4300	170	35	055_Mz9_5	8460	510	1067	75	5350	250	657	31	926	36	79.4	8.1	130	11	055_Mz9_5	4.17	0.52	70	19	53.9	8	131	16	16673.6	65.0769
055_Mz9_5	75200	8100	167000	17000	20300	1600	52000	15000	13900	4800	342	41	055_Mz9_6	8630	550	739	42	3080	150	264	17	298	17	17.6	2.6	24	2.7	055_Mz9_6	0.57	0.11	119	18	79	11	155	18	13053.2	359.583
055_Mz9_6	80700	9000	159000	16000	18000	1700	56000	19000	11000	5000	119	23	055_Mz9_7	7710	620	999	65	5100	430	643	48	912	53	78.9	9.5	112.9	9.8	055_Mz9_7	3.55	0.49	41	13	51.2	6.5	121	18	15559.3	68.2905
055_Mz9_7	69500	9200	158000	17000	19400	1800	62000	12000	20000	6700	221	30	055_Mz9_8	9950	690	1167	93	6360	320	689	51	869	63	54.1	5.2	80	8	055_Mz9_8	2.67	0.35	85	16	59.5	9.5	132	16	19171.8	124.375
055_Mz9_8	66900	9200	153000	16000	21100	2500	78000	18000	15700	6300	152	21	055_Mz9_9	9190	740	1050	95	5410	300	624	50	741	69	54.3	4.6	71	7.3	055_Mz9_9	2.36	0.41	72	12	47.8	6.8	117	15	17142.7	129.437
055_Mz9_9	88000	15000	175000	20000	22000	2700	79000	31000	15100	6700	180	31	055_Mz9_10	9520	790	1010	61	6490	390	759	28	1063	83	87	13	148	16	055_Mz9_10	5.68	0.67	58	16	47	12	131	25	19082.7	64.3243
055_Mz9_10	74600	9000	166000	16000	20300	1400	72000	12000	23100	8100	361	31		9640	570	1076	58	5410	300	600	33	887	56	68.8	5.2	96.7	8.2		3.23	0.34	93	13	77	12	135	18	17781.7	99.6898
059_Mz6_1	68100	7900	154000	15000	16200	1600	49000	18000	8600	3100	620	110	059_Mz9-1	3980	580	270	49	924	83	70.9	6.5	75	10	7.8	2	10.9	2.8	059_Mz9-1	0.22	0.15	60	13	52.2	9.6	81	12	5338.82	365.138
059_Mz9-1	53600	9100	130000	12000	16000	1200	50000	12000	12600	4100	350	120	059_Mz9-2	3610	350	261	27	639	48	37.8	4	38.4	4.3	2.31	0.79	4.3	1.6	059_Mz9-2	0.111	0.082	45.3	8.6	48.1	5.9	66	8.7	4592.92	839.535
059_Mz9-2	44200	5000	86600	9500	10080	980	38200	9900	8200	2300	210	67	059_Mz19_1	5990	520	510	54	1690	140	122	12	119	11	8.6	1.7	14	2.5	059_Mz19_1	0.39	0.13	44.2	7.8	35.8	4.1	40.2	6.1	8453.99	427.857
TABLE 5. Trace element data with associated 2se errors continued													TABLE 5. Trace element data with associated 2se errors continued															TABLE 5. Trace element data with associated 2se errors continued
Spot location	La_ppm	2se	Ce_ppm	2se	Pr_ppm	2se	Nd_ppm	2se	Sm_ppm	2se	Eu_ppm	2se	Spot location	Gd_ppm	2se	Tb_ppm	2se	Dy_ppm	2se	Ho_ppm	2se	Er_ppm	2se	Tm_ppm	2se	Yb_ppm	2se	Spot location	Lu_ppm	2se	206Pb_ppm	2se	207Pb_ppm	2se	208Pb_ppm	2se	Total HREE	Gd/Yb
059_Mz19_1	52100	6000	100200	9400	11700	1300	40800	8700	9100	2900	209	54	059_Mz19_2	5920	510	519	47	1830	150	114.7	9.3	104	11	5.4	1.4	10	1.9	059_Mz19_2	0.293	0.095	44.3	6.6	30.5	5.8	63.1	5.8	8503.39	592
059_Mz19_2	51300	5700	110500	9800	12500	1300	52000	10000	11800	3300	292	65		5330	560	418	49	1670	160	107	12	98	14	5.6	1.1	9.2	1.9		0.298	0.083	66.5	8.1	39.2	4.8	65.8	8.6	7638.1	579.348
